# Supplementary material for: Silicon carbide-supported iron nanoparticles encapsulated in nitrogen-doped carbon for oxygen reduction reaction
Source: Royal Society of Chemistry journal article supplement (doi:10.1039/c5cy01539a), 2015-11-24
Supplement: c5cy01539a1.pdf [file c5cy01539a1.pdf]

Support Information for  
**Silicon carbide supported iron nanoparticles encapsulated in nitrogen-doped carbon for oxygen reduction reaction**

Jiayuan Li<sup>a,b</sup>, Jing Wang<sup>a</sup>, Dunfeng Gao<sup>a</sup>, Xingyun Li<sup>a</sup>, Shu Miao<sup>c</sup>, Guoxiong Wang<sup>\*a</sup> and Xinhe Bao<sup>\*a,c</sup>

<sup>a</sup>State Key Laboratory of Catalysis, Dalian Institute of Chemical Physics, Chinese Academy of Sciences, 457 Zhongshan Road, Dalian 116023, China.

E-mail: [wanggx@dicp.ac.cn](mailto:wanggx@dicp.ac.cn) (Guoxiong Wang). [xhbao@dicp.ac.cn](mailto:xhbao@dicp.ac.cn) (Xinhe Bao).

<sup>b</sup>University of Chinese Academy of Sciences, Beijing, 100039, China.

<sup>c</sup>Dalian National Laboratory for Clean Energy, Dalian Institute of Chemical Physics, Chinese Academy of Sciences, Dalian, 116023, China.

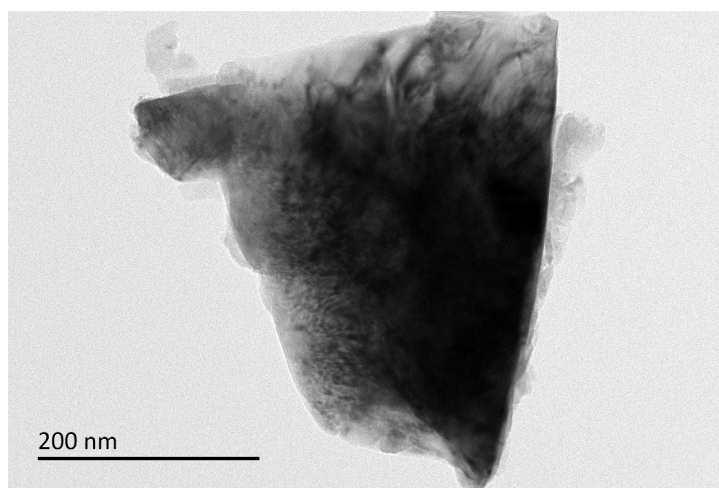

(a)

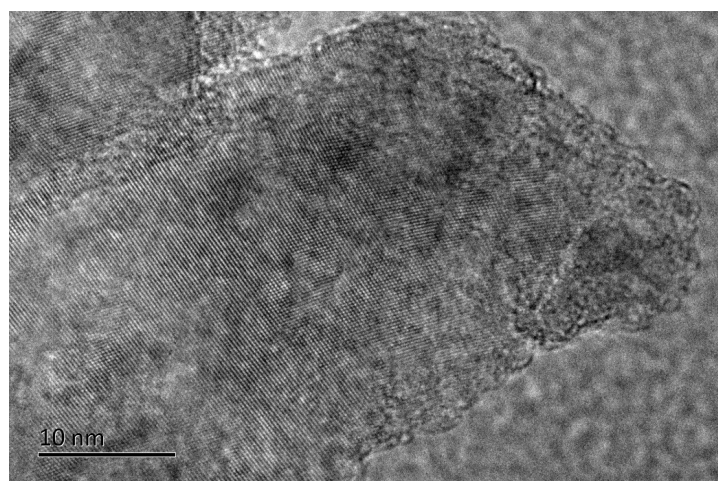

(b)

Figure S1 (a) TEM and (b) HRTEM images of SiC.

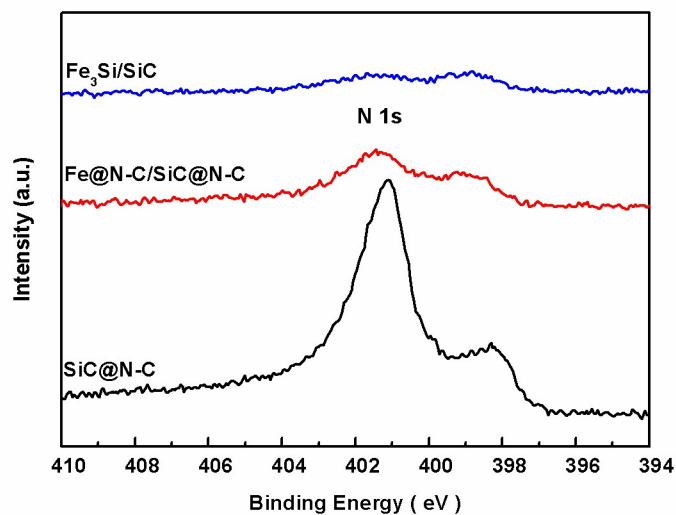

Figure S2 N1s XPS spectra of SiC@N-C, Fe@N-C/SiC@N-C and Fe<sub>3</sub>Si/SiC.

Table S1 The ORR activities on the non-precious catalysts in alkaline medium. All the potential values from references were converted to vs. RHE for comparison.

| Sample                                                                   | Activity (vs. RHE) |                  | Reference |
|--------------------------------------------------------------------------|--------------------|------------------|-----------|
|                                                                          | E <sub>onset</sub> | E <sub>1/2</sub> |           |
| Fe@N-C/SiC@N-C                                                           | 0.88 V             | 0.84 V           | This work |
| Nitrogen-doped carbon nanosheets                                         | 0.97 V             | 0.85 V           | 11        |
| Fe <sub>3</sub> O <sub>4</sub> in 3D nitrogen-doped graphene aerogel     | 0.78 V             | ---              | 12        |
| Nitrogen-doped C/SiC                                                     | 0.83 V             | 0.77 V           | 25        |
| Fe/Fe <sub>3</sub> C nanoparticles encapsulated in nitrogen-doped carbon | 0.86 V             | 0.82 V           | 27        |
| Fe <sub>3</sub> C in graphitic layers                                    | 1.05 V             | 0.83 V           | 31        |
| Nitrogen-doped graphene/carbon nanotube                                  | 0.87 V             | 0.69 V           | 32        |
| Fe/Fe <sub>3</sub> C-melamine/N-KB composite catalyst                    | 0.88 V             | 0.80 V           | 33        |
